# Supplementary material
Source: PubMed Central journal article supplement (PMC3426678)
Supplement: AEM.01406-12_zam999103638so7.pdf [file AEM.01406-12_zam999103638so7.pdf]

>gi|123967810|ref|YP\_001008668.1| photosystem II reaction center protein H [Prochlorococcus marinus str. AS9601]

MGQKTALGSLKKAIGNSGQGKVVPGWGAVPVMTVIGLLLLVFLVILLQIYNQSLLLQGFSVDWNGN

>gi|123967811|ref|YP\_001008669.1| photosystem II reaction center protein N [Prochlorococcus marinus str. AS9601]

MQTLSSAPDPAVSIIVTILALLLALTGFGLWTAFGPKAAKLTDPWDDHDD

>gi|123967812|ref|YP\_001008670.1| photosystem II reaction center I protein I [Prochlorococcus marinus str. AS9601]

MLALKISVYTIVFFFVGFIFLGFGLASDPTRTPNRKDLESPQD

>gi|123967831|ref|YP\_001008689.1| photosystem II reaction center protein K [Prochlorococcus marinus str. AS9601]

MLILFNTFAELPEAYKAFAPTVDVPLIPLIFFLLVFVWQAAVGFK

>gi|123967859|ref|YP\_001008717.1| photosystem II reaction center L [Prochlorococcus marinus str. AS9601]

MQVNENPNKVPVELNRTSLYLGLLSVFLGILFSSYFFN

>gi|123967860|ref|YP\_001008718.1| photosystem II reaction center protein J [Prochlorococcus marinus str. AS9601]

MSKLGPDGRIPDRLPDGRPAVAWERRWTEGTLPLWLVAATAGGIIVIFVLGIFFGSYQGCVGAGG

>gi|123967875|ref|YP\_001008733.1| photosystem II reaction center protein T [Prochlorococcus marinus str. AS9601]

MEAFAYVLILTAVVTLFFAVAFRDPPKFDRK

>gi|123967878|ref|YP\_001008736.1| photosystem II reaction center protein M [Prochlorococcus marinus str. AS9601]

METTNFGFVASLLFVGVPTIFLIGLFISTQDGEKSSFYSDSSKGRLGPKR

>gi|123968624|ref|YP\_001009482.1| photosystem II reaction centre N protein [Prochlorococcus marinus str. AS9601]

MFAIALGMSPFKIVTVAISASIFIIAFTWVSIKGLRKLANELIEDNENNQDN

>gi|123968756|ref|YP\_001009614.1| photosystem II protein Y [Prochlorococcus marinus str. AS9601]

MLRTIVVFAPIIAALAWVIFNIQKPAREQFNDRDFLGKD

>gi|123969385|ref|YP\_001010243.1| putative photosystem II reaction center protein Z [Prochlorococcus marinus str. AS9601]

MQAVNFFFVNALLFASLIAVVGVPVLYVTQPSTEEGQRESRRKIYSIAAVWVVLVFTGIVSSLV

>gi|123967611|ref|YP\_001008469.1| photosystem II protein X PsbX [Prochlorococcus marinus str. AS9601]

MFQISNLLIAADFSAEVANNSAVGMIGSFIAAALLIVVPATAFLIFVSQKDSLDRSTGRR

>gi|123967892|ref|YP\_001008750.1| photosystem I reaction center subunit IV [Prochlorococcus marinus str. AS9601]

MAISRGDLVRVKRPESYWYNEIGKVASVDTSGIKYNCVVRFDKVNAGISGTDGGANTNNFAESELEKA

>gi|123968061|ref|YP\_001008919.1| photosystem I PsfA protein (subunit III) [Prochlorococcus marinus str. AS9601]

MKFFFSIITSVFLFLGITPIALAANGPALNADRASTEYASALTKCSENPKFIERANSATTQKDIARFERYGKASCGDDGLP  
HLIIGPPLEPWGALLNRGHEGDLLIPGVLFYIAGIIGWSGREYLIESKTKNPADLEIIIDLARKCLVKGAQWPLLANKQ  
GRNGDLREKDNITLNGPR

>gi|123968131|ref|YP\_001008989.1| photosystem I reaction center subunit XII [Prochlorococcus marinus str. AS9601]

MENIRNNFFTMEPTQTINLIALSLIVVIHAGVLALRLGISLGRN

>gi|123968488|ref|YP\_001009346.1| photosystem I PsfK protein (subunit X) [Prochlorococcus marinus str. AS9601]

MFTTLFAAADPATFSWSPKCAVVMIAACNVFAYAIARATIRKPNEGFEIPNSKFYGGLSHASVVGANCLGHIFGIGAILGL  
ASRGVL

>gi|123969255|ref|YP\_001010113.1| photosystem I reaction center protein subunit XI [Prochlorococcus marinus str. AS9601]

MSDFQKSFSESTSSIKFDEKYIDNSVQPNDIGVAEQWAVKTVADPCVGNLATPVNSGYFTKAFINNLPFYREGISPNFRG  
LETGAAFGYLLYGPFMTGPLRNSEFALTAGLLAIGAVHILTALLVLYNAPGKAPNVQPPDATVNNPPKDLFTRAGWA  
DFTSGFWLGGCGGSVFAWLLVGTLLHLDTIMPIIKNIWTAG

>gi|123969256|ref|YP\_001010114.1| photosystem I subunit VIII (PsaI) [Prochlorococcus marinus str. AS9601]

MPSDLPSLLPSIFVPLIGIAMPVAVFIVLIGRFITATE

>gi|123969349|ref|YP\_001010207.1| photosystem I subunit VII [Prochlorococcus marinus str. AS9601]

MSHAVKIYDTCIGCTQCVRACPLDVLEMVPWDGCKAGQIASSPRTEDCVGCKRCETACPTDFLSIRVYLGEDETSRSMGL  
AY

>gi|123967781|ref|YP\_001008639.1| photosystem II PsbA protein (D1) [Prochlorococcus marinus str.  
AS9601]

MTTIQQQRSSLLKGWPQFCEWVTSTNNRIYVGVWFGVLMIPCLLTAAACFIVAFIAAPPVDIDGIREPVAGSFLYGNNIIS  
GAVVPSSNAIGLHFYPIWEAATVDEWLYNGGPYQLVIFHFLIGISAYMGRQWELSYRLGMRPWICVAYSAPVSAFAV  
FLVYVFGQGSFSDGMPLGISGTFNFMFVQAEHNILMHPFHMAGVAGMFGGSLFSAMHGSLVTSSLIRETTETESQN  
YGYKFGQEEETYNIVAAHGYFGRILFQYASFNNSRSLHFFLAVFPVVCVWLTSMGICTMAFNLNGFNFNQSVVDANGK  
IVPTWGDVLRANLGMVEMHERNAHNFLDLAAAESTTVALSAPAIG

>gi|123967786|ref|YP\_001008644.1| photosystem II manganese-stabilizing protein [Prochlorococcus  
marinus str. AS9601]

MTFNLSSQNFTATLIMRIRSFLAFVISLCITFAFVPVKTFASFERGNAQFTDVVNTGKANDCPTLDSSLVGSISLGNNGDSLK  
GICMHPTEVYVVKVPGTKRKAEEVSTKIISPRNNTTVTEVYGDIDSGTFTTEKGGIDFQLITVLTPGGLEVPFAFSAKDLTAD  
LPSSIEPGTEVSGSTFTPNYRTGDFLDPKARAKNTGVEYAQGLVALGGDDEELAKENIKVDVNGTGVTLSINNVDSDTD  
EFAGTFEAIQPSDTDMGSKDPLDVKIIGELYGRKA

>gi|123967876|ref|YP\_001008734.1| photosystem II PsbB protein (CP47) [Prochlorococcus marinus str.  
AS9601]

MGLPWYRVHTVVINDPGRLLAVHLMHTALLAGWAGSMALYELAI FDPSDAVLNPMWRQGMVMPF MARLGITSS  
WNGWDITGATGVDPGFWSFEGVAAAHIVFSGLLMLASIWHTYWDLDLWEDSRTGEPALDLPRIFGIHLLLAGLTFC  
GFGAFHCANVGIWVSDPYGLSGHVEPVAPSWGVEGFNPFNPGGIVANHIAAGLMGIIGGIFHITNRPGERLYRALKLG  
SLEGLASALAAVLFVSVVSGTMWYGSATPIELFGPTRYQWDSGYFKTEINRRVQAAIDDGATKSEAYASIPEKLAFY  
DYVGN SPAKGG LFRV GALVNGDGLPTGWQGHIAFQDKEGNELEVRRI PNFFENFPVILEDKEGNVRADIPFRRAEAKY  
SFEQTGITATIYGGDL DGQTFTDPAVVKRLARKAQLGEAFKFDRETYKSDGVFRSSPRAWFTYAHLCFGLLFLFGHWW  
HASRTL YRNSFAGIDAEIGDQVEFGLFKKLGD ETRRIPGRV

>gi|123968867|ref|YP\_001009725.1| photosystem II PsbD protein (D2) [Prochlorococcus marinus str.  
AS9601]

MTIAVGSAPQRGWFDVLDLWLRDRFVFIGWVSGLLLLPCAYLAIGGWVGTTFVTSWYTHGVASSYLEGCNFLTAAV  
STPGDAMGHSLFLWGPEAQGSFVRWLQLGGLWNFVALHGVFGLIGFMLRQFEIAGLVGIRPYNALAFSAVIAVFTSIF  
LIYPLGQHSWFFAPSGVAAIFRYILFIQGFHNITLNPFHMMGVAGILGGALLCAIHGATVQNTLYEDTSIYTDGKVQSST  
FRAFDPTQEEETYSMITANRFWSQIFGIAFSNKRFLHFLMLFVPMGMWVTSSIGIVGLALNLRAYDFVQSIEIRAAEDPEF  
ETFYTKNILLNEGMRAWMSSVDQPHENFVFPPEEVLPRGNAL

>gi|123968868|ref|YP\_001009726.1| photosystem II PsbC protein (CP43) [Prochlorococcus marinus str.  
AS9601]

METPFNNLLRAPNQSIEETGYAWYVGNARLINLSGRLLGAHIAHSGLIVFWAGAMMLFEVNHFTFDKPMWEQGLIC  
MPHVAMFGYGIGPGGEVTDIMPFFQAGVVHLIASAVLGFGGIYHSLAGPEKLEEDFPFFSTDWRDKNQMTNILGYHLI

VLGVGALAWSVNWCFIGGAYDTWAPGGGEVRLVNPTLDP RVILGYLFRSPWGGAGSIIGVNSIEDIVGGHVYVGITAI  
GGIFHIFTKPFGWARRAFIWN GEGLLSYALGGICVASFIAS TFIWFNNTAYPSEFYGPTNAEASQAQSFTFLVRDQRIGA  
NVGSTMGP TGLGKYL MRSPTGEIIFGGETMRFWDFRGPWLEPLRGPNGLSLEKI QNDIQPWQVRRAAEYMT HAPNA  
SINSVGGIITEPN AVNFVNL RQWLAAAQFFL GWFTFIGHLWHAGRARAAAAGFEKGIDRKSEPALEMPDL D

>gi|123968099|ref|YP\_001008957.1| putative photosystem II reaction center Psb27 protein  
[Prochlorococcus marinus str. AS9601]

MLLKWASKLFFKNLTKAISFAISLIVVFTLFSSPSIAAKTAMTGDYTKDTISVVKTLQTAVDTPK DSPNKDEVRSEAL TLTD  
YISRYRNRGMVNKTQSFTTMQTALNAMAGHYKNFASRPLPKLKERLTKEFSLAEKMLVRES

>gi|123968467|ref|YP\_001009325.1| photosystem II reaction center protein Psb28 [Prochlorococcus  
marinus str. AS9601]

MTSNKTAKIQFYEGTDEPVVPEIRLRSKDGTTGQALFLFEKQALSSITDGEITGMRMIDTEGEILTREVKVKFVDGEP I F  
LEAVYIWKNTPDFDRFMRFANSYAKSNGLGYSEKK

>gi|123968737|ref|YP\_001009595.1| photosystem II oxygen evolving complex protein PsbP  
[Prochlorococcus marinus str. AS9601]

MKNIKFNPFKYFLVFLCLT LSACSGGLNAGLEAYQSPDGRYAFLYPTGWTRVKVDGGPEI IYHDLINSNETLSLVISDVN  
KEVQLEQLGSPSEVGQTLIDK VIAPEGSGR KVKLINANKREASN HIFYDLEYELNLNEQARHELATVVIDRGTLYTF AVGT  
NEERWNVKVDGMFNNVIESFNLI

>gi|123967686|ref|YP\_001008544.1| photosystem I assembly protein Ycf3 [Prochlorococcus marinus  
str. AS9601]

MPSNQNRDNFIDKAFTVIAESIVKIMPIAEKEKKAYIYYRDGLAAQNNGDYSEALEYYKESL LLEENKIDRGETLKNMAI IY  
MSGNEEDLSIETYEKALEENPKQPSCLKNIGLIYEKRGRYAEQNGDL DQRDIWFDKAAEVVSKAVR LYPGGYLDIENWL  
KNSGRSSIDIYL

>gi|123968866|ref|YP\_001009724.1| photosystem I assembly protein Ycf4 [Prochlorococcus marinus  
str. AS9601]

MNSDLT SFDKIEQKIGGSRKISNYIIGGMLTIGGIGFLLASISSY TGRDLLPLGNPSTLLFIPQGIIMGAYGVIANLLNFY L WY  
LVYINFGSGSNYFDKSSKSVEIKR KGLFKDVEVKLNFDEIKSVKLDISEGFNPRRRIALVLKGRKKPLPLSGAGELK PLLQVEE  
EGARLAKFLDVNLEGLK

>gi|123969259|ref|YP\_001010117.1| photosystem I P700 chlorophyll a apoprotein A2  
[Prochlorococcus marinus str. AS9601]

MATKFP SFNQGLAQDPTTRRIWYGIATAHDFESH DGMTEEKLYQKLFSTHFGHLAIIALWVAGNLFHIAWQGNFEQ F  
VLDPTHVRPIAHAIWDPHFGSGITEAMTQAGASGPVNIAYSGLYHWWY TIGMRTNEQLFQASIFMSILACWTLFAGW  
LHLQPKFRPSLAWFKNAESRLNHHLAVLFGFSSIAWTGHLVHVAIPESRGQHVGW DWNWLTVLPHPAGLAPFFTLN WG  
AYAQNPD SLDQVFGTAEGAGTAIFTFLGGLHPQSEALWLTDIAHHHIAIGTVFVIAGHMYRNTFGIGHSLKEITEAHNTR  
HPNDPHKGSFGINHDGIYETVNNSLHFQLGLALASLGVATSLVAQHMGALPSYAFIARDYTTQSALYSHHQYIAMFLM

VGAFAHGAIFVVRDYDPELNKDNVLRVLGTKEALISHLSWVTMLLGFHTLGIYVHNDVVVAFGNPEKQILIEPVFAQFV  
QAAQ GKMMYGFNALLSDPTSSASLAANSLPGNHYWMDLINRQDALS AFLPIGPADFLVHHAIALGLHTTALILIKGALD  
ARGTKLIPDKKDLGYAFPCDGPGRGGTCDSSSWDAMYLAMFWALNLLAWVTFYWHWKHLAIWQGNVAQFNESGT  
YLMGWFRDYLWLN SAQLINGYNPFGVNSLSPWAWMFLFGHLVWATGFMFLISWRGYWQELIETLVWAHQRTPIAN  
LVGWRDKPVALSIVQARLVGLAHFTIGNILTFGAFVIAS TSGKFG

>gi|123969260|ref|YP\_001010118.1| photosystem I P700 chlorophyll a apoprotein A1  
[Prochlorococcus marinus str. AS9601]

MTISPPESGEKNKKVLEDPVKADPRPIDFAKLDKPGFWSSKLSKGPKTTTWIWNLHADAHDFDVHTGDAAEATRKFISA  
HFGHLAVIFIWMSAAFFHGARFSNYSGLADPTHVKPGAQQVVAIVGQEMLNADLGANYNGIQISSGIFHMWRA  
WGITNESELMALAIGAVVMAALMLHAGIFHYHKAAPKMEWFQDIESMLNHHIAGLVGLGSLAWAGHCIHIGAPTAA  
LLDAIDAGSPLVINGKEIATIADMPMPHQLCDPQIIGQIFPGLASGTGNFFSLNWLAFSDFLTFKGGLNPNVTGSLWMTD  
VSHHHLAFGVIAIIGGHMYRTNYGIGHSMKEILDSQQGDPILPAPKGHQGLFEFMAESRHAQLSVNLAMLGSISILVSH  
HMYAMPPYPYIATDYMTVLGLFTHHMWIGGLFIVGAGAHAGIAMVRDYDPAKHIDNVLDRIKARDALISHLNWVC  
MWLGFHSFGLYIHNDTMRALGRPQDMFSDSAIQLQPIFAQWVQSIQASAVGTFLLAGTSEALPHKALSEVFNGSLVEV  
GGKVAIAPIPLGTADLMIHIIHAFQIHVTVLILLKGVLYARSSRLIPDKASLGRFPCDGPGRGGTCQVSSWDHVFLALF  
WMYNCLSIVIFHFSWKMQSDVWGLTGGNFAQSSITINGWLRDFLWAQASQVLTSYGQSISMYGLMFLGAHFIWAFS  
LMFLFSGRGYWQELFESIVWAHNKLVAPTIQPRALSITQGRAVGVTHFLVGGIATTWAFHARLFLGLG

>gi|123969317|ref|YP\_001010175.1| photosystem I protein PsaD [Prochlorococcus marinus str.  
AS9601]

MTETLVGQFPKHIGSTGGLLSAETEEKYAIWVWSSKEQAFELPTGGAALMHEGDNLMYFARKEQCLALGTQLRAFKP  
RIEDFKIYRIFPGGDIEFLHPKDGVPFEKVNREGREKVGHNPRRIGENPNPAGLKFTTKNTFD

>gi|123969404|ref|YP\_001010262.1| putative photosystem I assembly related protein Ycf37  
[Prochlorococcus marinus str. AS9601]

MEISSFQSYLIILFVVLIIISIFVFRQFLKTRSEELNLVKFEQKGLDSL TQATELYEFGSIQIKKRLYPEATKTKFLKAIENYENEPD  
EAKAIINNALGFSYAAQNEFKKAIKHYKSAIKSLPEYPIALNNLASAQQRLL EYDLAYETYQKVLVIDPKNKTAIKKSKELEK  
RNNYEPYKGIKDKGF

>gi|123968896|ref|YP\_001009754.1| chlorophyll a/b binding light harvesting protein PcbD  
[Prochlorococcus marinus str. AS9601]

MLQTYGKSDVTYDWYAGNSGVVGRSGKFIAAHAHAHAGLMMFWAGAFGLFELARYDASIPMGAQKAIVLPFLAGIGI  
GGIENGVITEPYGIVVICTLHLIFSAVLGAGLLHSNKFAGDLGDYPENSKPQKDFEWD DPKLTFILGHHLIFLGLGAIM  
FVEWARIHGIYDPAIGSTRQVIYNLDIAAIWNHQDFDLKIDSLEDVMGGHAFLEIIGGVFHICTKQFGEYTEFKGKGL  
LGAEAILSYSVVGVSYMAFVAAFWCASNTTIYPVDLYGEPLKQFEFAPYFTD TVDLGS GAYSSRAWLANTHFYLGFFFL  
QGHLWHALRAMGDFDKKIGQAFDNIENTKITQN

>gi|33864850|ref|NP\_896409.1| phycobilisome rod-core linker polypeptide CpcG [Synechococcus sp.  
WH 8102]

MAIPLLEYAPITQNSRVAALRVQSDATARANSMDIAMDRDNLVTVIESAYRQIYFHAFKSDRDVNLESQKDGQITVRD  
FIRGLVLSDTFKRSFYGMNSNYKVVRLHVEKLLGRKTNKSEEIAWSIVIATKGV EGLVDVLLDSQEYLDAFGYDTPVSQRN  
RVLPGRELGDTPFNITSPRYDEYYRGILGFPQIVFMGGPAKQIPARAKIKRGGSPSDYMAWLKDLMPNPPGGSSSTDI  
DYMSRVPYRSIGR

>gi|33865608|ref|NP\_897167.1| phycobilisome core component-allophycocyanin beta-18 subunit  
[Synechococcus sp. WH 8102]

MRDAIGGLIGRYDQLGRYLDRSAIDSIEKYLDESSLRIQAVELINREAAEIVREASQRLFRDEPELLPGGNAYTTRRLAACL  
RDMDYFLRYASYALVAADSTILNERVLNGLDDTYKSLGVPTGPTVRSIILLGEVIVERLQAAGVESARLAVVAAPFDHMA  
RGLAETNVRQR

>gi|33866521|ref|NP\_898080.1| phycobilisome linker polypeptide [Synechococcus sp. WH 8102]

MIAIKPTRDFTNLGRISFSANNASKPKQNTAINRYRAEQTQGGLISRKGLAASSQNEYKENLCSAMGIGIPRVHSECPF  
SSVNDQYAATGNEALEVAIEAAYRQVLGNLGPITISQKCIELSQLKNGEISVRDFVAGLAKSDLYRENYFSKVSPIRGIELN  
YKHLGRPPINQAEVSAAISLIASKGFNAFIDQITRSGEYLEVFGTDTVPYLRAWTSEARAYCSTFANLARVTPGNASSDTI  
VERRSQLVVEFSNARSLSEAGNKYEVSFGFSYSKATSDPTSA AFLRMYQSKTAKSWN

>gi|33866528|ref|NP\_898087.1| phycobilisome polypeptide [Synechococcus sp. WH 8102]

MADIPDLAELIRSAQVQGLSSDHSLEEARQIIGAADQERRQLS QEELLSLCAASGQDASLPRLQNHADDLVNQARCH  
LLEQQPQLVQPGGALFPGERADACWRDCWHFLRVIVYAVACQRSNFTNPTGMAALRELYQRMGVPT EGLNIALMQL  
NVLAAQEFERFADQELINACFQHLEQLNKTA VKS

>gi|33866529|ref|NP\_898088.1| phycobilisome rod-core linker polypeptide (L-RC 28.5) [Synechococcus  
sp. WH 8102]

MALPLLGYPLSTQNCRVSNLAGDNSTVQSPLYGTSAAAGDESTRAEMDR LIEHAYLQVFFHAMRSDREPFLSQLRSGNI  
TVRDFIRGLLLSERFQQGYQCNLNRYRMVDQVVGRVLRPVHSDAEQRAW SIVIGEKGFATFVDALLDSSEYMDSFGY  
DLVPQQRSRLPGRALGETPIHQFPQRYGADWRDALQDRAPSNQAAQMQL ETSAAWVNGQPPAFALRIWGLGLAL  
VGGFELGRVLTIALAMAKS

>gi|33866531|ref|NP\_898090.1| phycobilisome linker polypeptide [Synechococcus sp. WH 8102]

MPFGPASLLGVERFSEESEAPFELIPGDDARKEQIIRAVYKQVLGNAYVMDSERQVVAESQFKLGEISVRDLVRRIAKS  
DLYRSRFFESCARYRYIELAFRHLLGRAPADFEEMRGRHSERLDSSGYDADIDSFVDSDEYQNAFGEWTVPFQRGWKTES  
CGTMQEFTWSFQLLRGNSSSSKGLAGISSKLGGSAYQNRAIPVPPSSTEALGWSFRPSPNLQDAPTRLGVGAGEQ  
GLTYRVEVTAYSANNVRRISRYTRS NRVFYVPFDKLSEQFKRIHREGGKIASITPVT

>gi|33866532|ref|NP\_898091.1| phycobilisome linker polypeptide [Synechococcus sp. WH 8102]

MASNQTS LGFGATTKWGNPVSFQRKGQAGQKPALTIGEFKKQSCDQMAIGVGP RSHADCPHRVTSECYSPEDNGSL  
ETVIAASYRQVFGNAHV MNFERCTELEAQLRDGR LTVRDFIRGLAKSSFYKSRFFNSVAPQRGV ELNVKHLGRAPETQ  
AEISAMITLQAEQGQ GALIDSIVDSA EYLEVFGSDVVPYARSWSSPADLSTAAFPMLAALEKSFAGSDSARGGSPALTRS  
LASGIAPRISVPSQAVGVRPSASFTSGRFSSKAPGITS GND SAPLRGDAYVT FGLGQREQETFQRCPGDS PDQLNALIRS

AYKQVMGNPHLMEFERALSAESKFIDGYLSTREFVRAVGLSAEYKRRFFETNAPYRFIELNFKHFLGRAPQSQAIESEHTK  
ILAEGGYEAEICSYVDSVEYQSIFGEDTIPYARILTENGRSQVAFNRHLSLAEGFAASDTVLSSSSLVSSVATGMVPSGWS  
ATTRINRTGTQSGAPDPTKKRFRIVVATQAARSRQRTAGNTYLVSGKDMSSQMKYIHARGGKIVSITEVM

>gi|33866533|ref|NP\_898092.1| phycobilisome linker polypeptide [Synechococcus sp. WH 8102]

MTEPTTLASQPNVDTSHAAVVVQQTyrQVFGNRHLMELDVNSSIEALFMNGDLTVQGFVMALAQSPTYKLLFFETNS  
PYQFVELNFKHLLGRPPHDQVELMNHVRLQLQDEGFEEIASVYSEEYLSAFGVDQVPYNRASESVMGGRTLNYTRSR  
VVDAGYAGYDSAERQSKLLQSLCSGNSPDVDRKSVGNANSLTINWTSRRQVGANRRRAVQKSVVNQTSMSATIRSILS  
QGGKILSIKA

>gi|296283646|ref|ZP\_06861644.1| photosynthetic reaction center subunit L [Citromicrobium  
bathymarinum JL354]

MLSFERKYRVAGGTLVGGDLDFWVGPFFYVGGFVTTAFFALLGTSLIVYGAAIGGTWNIWQIDIAPPAIEYGLGLAPLR  
EGGLWQIITVCAIGAFVSWALRQVEISRKLGMGFHIPIAFSFAIFAYLSLEVFRPIMLGAWGHAFYPYGFHLDWVSNVG  
YQGLHFHYNPAHMLAVTFFFGTTLMLAMHGGVILSAVNPPEGEDVKHGQHENQYFRDIAYSIGPLGIHRLGWFAAI  
NAGFWSAICILISGPFVWSGWPFYFDWYLQLPFWNDMGLGGLG

>gi|296283647|ref|ZP\_06861645.1| photosynthetic reaction center subunit M [Citromicrobium  
bathymarinum JL354]

MASFHSLYSQIQIHGPYDPGLPLKGGHEPPRIKPVLNRWIGKIGDPQIGPTYLGFCGIASLICGFIAIEIIGLNFVWASVHWN  
PVAFIEGMAWHRLDPPEAKWGFTPFVPLTEGGWWIWAGFFLTASILLWCRMYLRKALGMSTHVAVAFASAIPLY  
LSLGFIRPMLMGSWHEAPPFGIIPHLNWTASFVLYGNFYNNPFCFSIVFLYGSVLLFAMHGGTILAVSRFGERETEEI  
VDRGTAAERGALFWRWTMGFNATFESVHRWAYWFAITTFSGAIGILLTGTVDNWWYLVGWKWLGAPEYPATYPD  
MTLPPEIAEQVRAATGGTSASLDLSAAPAPAPSPEVSQ

>gi|296283648|ref|ZP\_06861646.1| photosynthetic reaction center cytochrome c subunit-related  
protein [Citromicrobium bathymarinum JL354]

MTPLEKRPRSSLLGIFALAAAFATLLFVVLVPTWDAPWDTIESREWGWIRGAMNTFTSERTRSDDLNLVPASIEPFEAR  
VSAGEAYENVQVLGDLDAAQFDHMLSITEWVAPEEGCAYCHNPDAFASFAADDMYTKKVARRMMLTMVRDINANSR  
VGDVGVTCYTCYHRGQGVPPRHWFKAVAPKPPMGGIVGKPPWNRATAKTRDFFPRAAFENYLLDDQQIMGAQAR  
SVSGEVTDLADLENIYILMMQMSDGLGVNCFCHNSRAFADWSQSTPKRITAWYGIRMTRGINRDYLVQMHDLFPA  
DRLGPLGDVAKVDCGTCHNGMSRPLGGAPMARGYEGLRGPVSGSAITRETAFTETRLPYEAEISEPAPTPAGLQQGGE

>gi|296283650|ref|ZP\_06861648.1| photosynthetic complex assembly protein [Citromicrobium  
bathymarinum JL354]

MATAMPLATATSGTRETSLSDDPNDLPIDIALGLPGPLPDGEHILWHGKPDRAALARYLFRWPWLTGYFALFALLPIA  
ATARAGASVAQIAFSPLLLLPVALPIAGLVLLFAWLMSRTTTYVITDRRVVFQVGVAFTRTINIPLALVTDVSSRERKR  
GIDI  
ALTLLRRPNKIAWLALWPHARSTKLSAPVPMRLRALPPASPAAILADAVRRAAGAVHAPRIERSPVGISARPEHV

>gi|296283651|ref|ZP\_06861649.1| photosynthetic reaction center subunit H [Citromicrobium bathyomarinum JL354]

MESNVVGNLDVAILCVIAFVTFVGLVVYLRREDKREGYPVEVSGLMGRTHSAEGFPAVPRPKLFFRPHGRGVAQAPR  
VEEPETVRPGQTLPPMAFPLDPGPDPLEEGIGAAAYTTLREDEPDLDVEGEPKLISLNDHPEYIYPTGDPDPRGWVLVSA  
DEKVVGVKVDLWFNRAEFFLRIFEVSIDGAEGRRLLIPSFFAEALPRDSAVRATTLIARDLRRAPIRADDSCITMREEDRLN  
GFFAGGLRFSTGHGQIHDPA

>gi|9971913|gb|AAG10475.1|AF279106\_37 proteorhodopsin [uncultured marine gamma proteobacterium EBAC31A08]

MKLLILGSVIALPTFAAGGGDLASDYTGVSFWLVTAALLASTVFFFVERDRVSAKWKTSLTVSGLVTGIAFWHYMYM  
RGVWIETGDSPTVFRYIDWLLTVPLLICEFYLLAAATNVAGSLFKLLVGLVMLVFGYMGGEAGIMAAWPAFIIGCLAW  
VYMIYELWAGEGKSACNTASPAVQSAYNTMMYIIIFGWAIYPVGYFTGYLMGDGGSALNLIYNLADFNKILFGLII  
WNVAVKESSNA

>gi|149688782|gb|ABR27802.1| proteorhodopsin [Candidatus Pelagibacter ubique]

MGKCLKLFALTAVALMGVSGVANAETLLASDDFVGISFWLVSMALLASTAFFFIERASVPAGWRVSVITVAGLVTGIAFI  
HYMYMRDVWVMTGESPTVYRYIDWLITVPLLMLEFYFVLAAVNKANSKIFWRLMIGTLVMLIGGYLGEAGYINTTLGF  
VIGMAGWFYILYEVFSGEAGKNAKSGNKALVTAFGAMRMIVTVGWAIYPLGYVFGYMTGGMDASSLNVIYNAADF  
LNKIAFGLIIWAAAMSQPGRAK
